# Supplementary material for: Anin situphotopolymerized composite solid electrolyte from halloysite nanotubes and comb-like polycaprolactone for high voltage lithium metal batteries
Source: Royal Society of Chemistry journal article supplement (doi:10.1039/d1ta00745a), 2021-01-01
Supplement: d1ta00745a1.pdf [file d1ta00745a1.pdf]

*Electronic Supplementary Information for*

**In situ photopolymerized composite solid electrolyte  
from halloysite nanotube and comb-like  
polycaprolactone for high voltage Lithium metal  
battery**

Hongli Xu,<sup>a,c,#</sup> Wei Ye,<sup>b,#</sup> Qingrong Wang,<sup>a,#</sup> Bing Han,<sup>a</sup> Jun Wang,<sup>a</sup> Chaoyang Wang,<sup>b,\*</sup>  
Yonghong Deng<sup>a,\*</sup>

<sup>a</sup> Department of Materials Science and Engineering, School of Innovation and Entrepreneurship, Academy for Advanced Interdisciplinary Studies, Shenzhen Key Laboratory of Solid State Batteries, Guangdong Provincial Key Laboratory of Energy Materials for Electric Power, Southern University of Science and Technology, Shenzhen 518055, PR China.

<sup>b</sup> Research Institute of Materials Science, South China University of Technology, Guangzhou 510640, PR China.

<sup>c</sup> Key laboratory of polymer processing engineering (South China University of Technology), Ministry of Education, Guangzhou 510640, PR China.

# These authors contribute equally in this work.

\* Corresponding author.

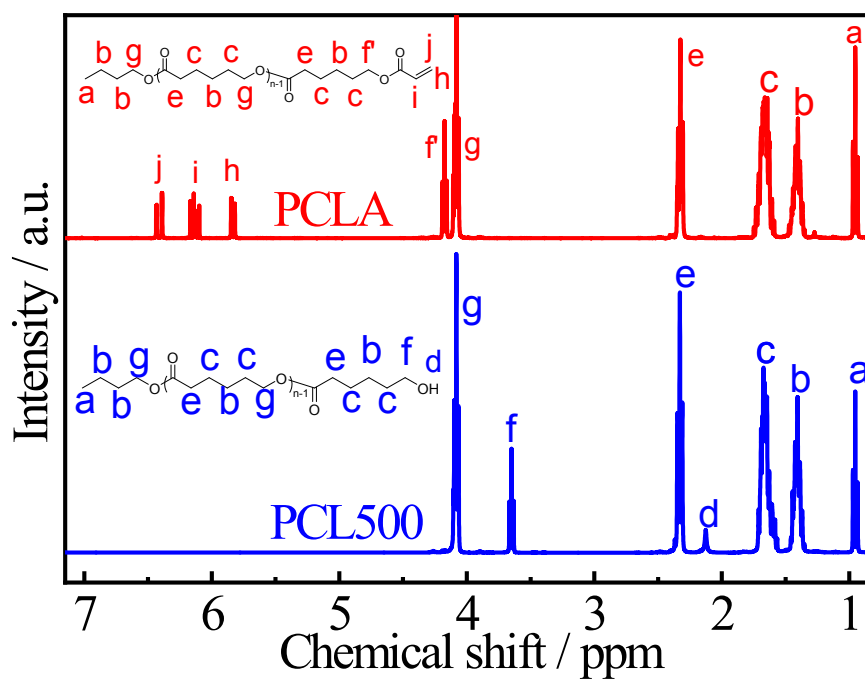

**Fig. S1.**  $^1\text{H}$  NMR spectra of PCL500 and PCLA precursor. Deuterated chloroform is used as the solvent with tetramethylsilane (TMS) as the internal standard.

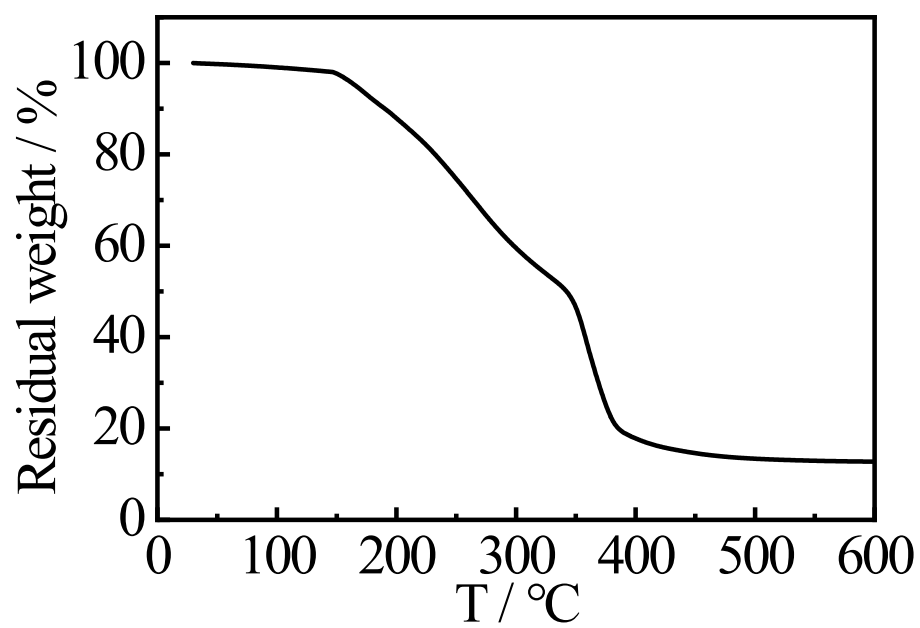

**Fig. S2.** TGA thermogram of CSE in the temperature range of 30 to 600 °C under N<sub>2</sub> at a heating rate of 10 °C min<sup>-1</sup>.

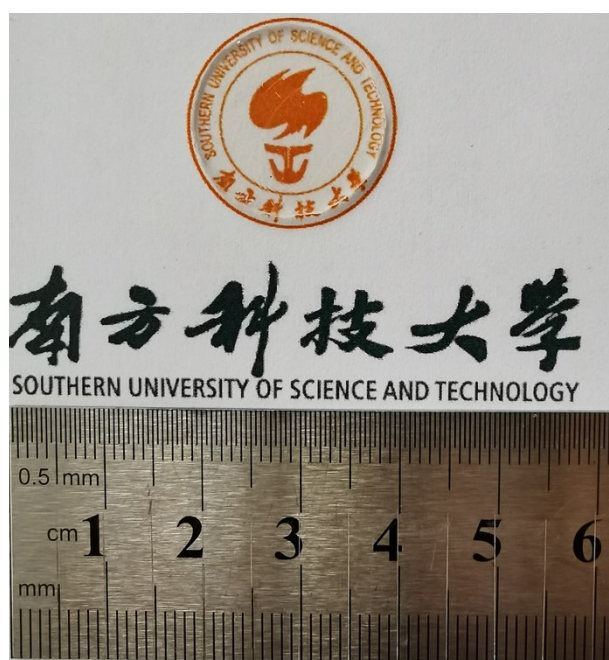

**Fig. S3.** Digital photograph of the transparent cured PSE film, using as control samples.

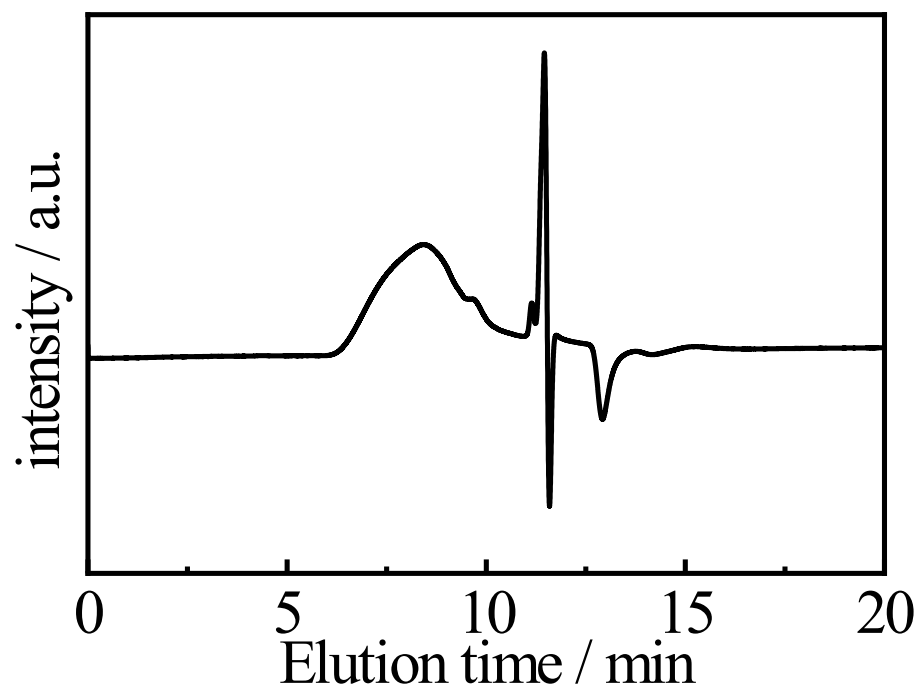

**Fig. S4.** GPC trace of the in situ polymerized comb-like PCL.

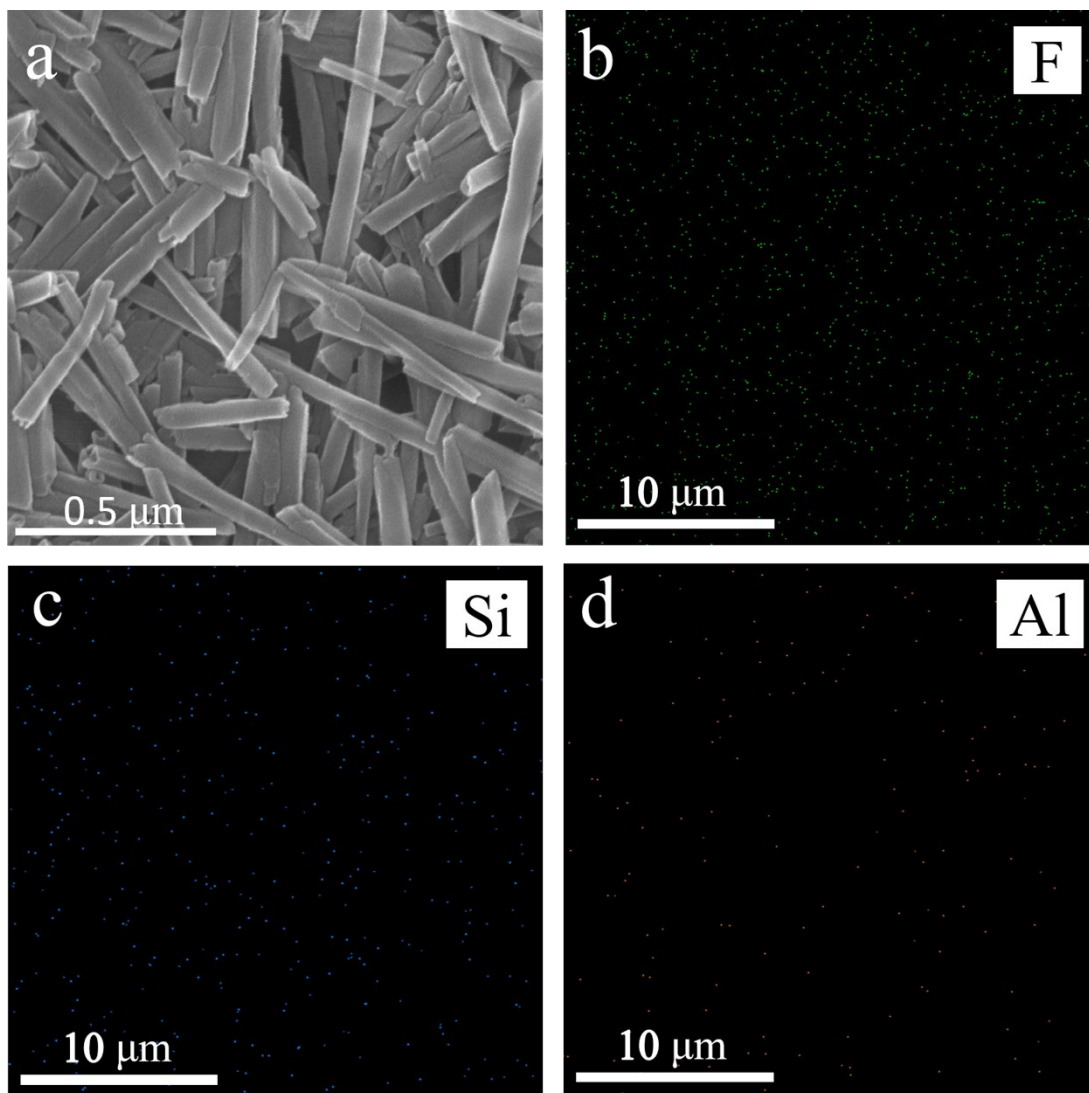

**Fig. S5.** (a) The SEM image of HNT, showing a self-assembled tubular structure at nanoscale and with a high aspect-ratio. EDS mapping of the (b) F, (c) Si and (d) Al elements on the surface of CSE film.

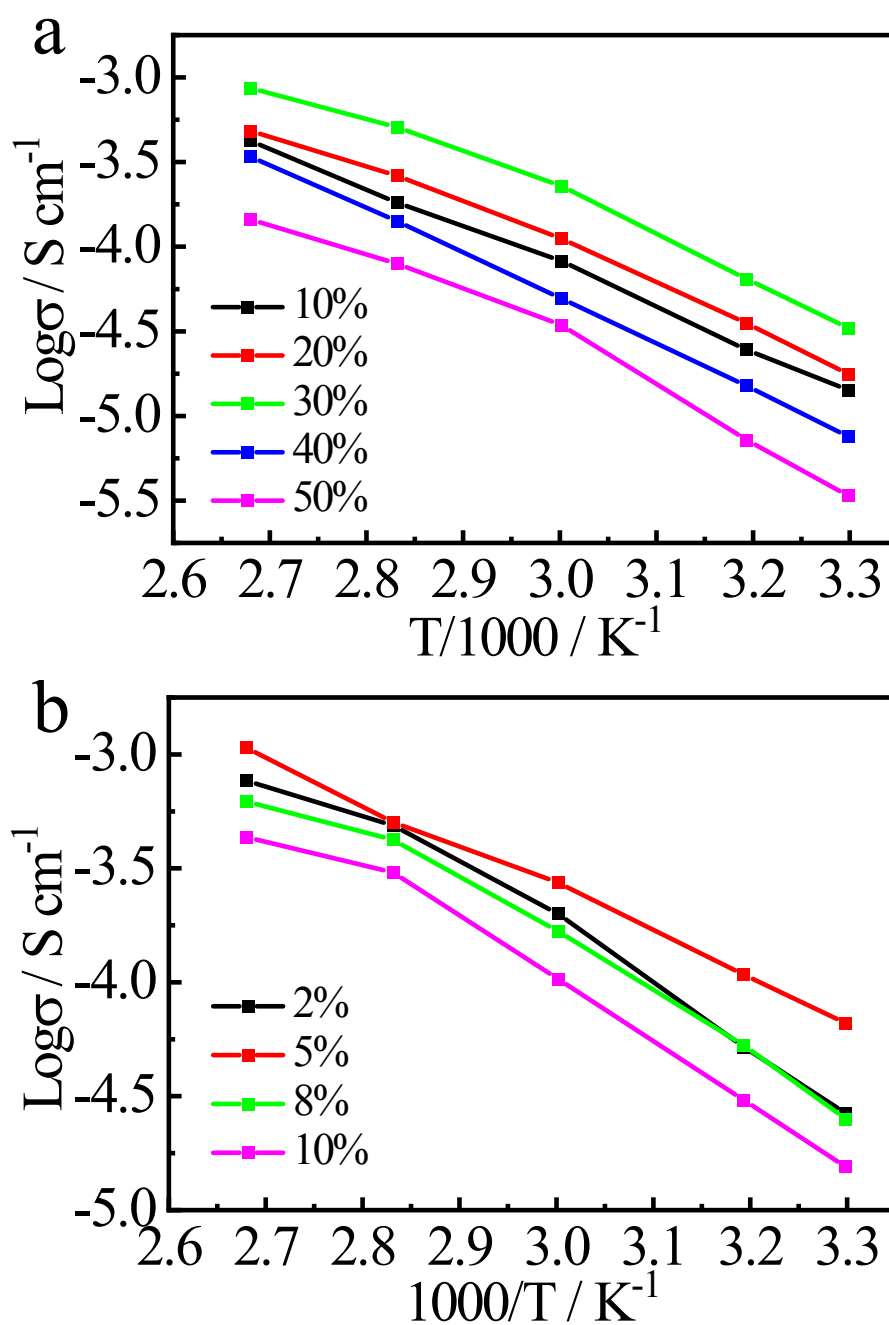

**Fig. S6.** (a) Ionic conductivities of the in situ polymerized PSE with different lithium salt contents as a function of temperature. (b) Ionic conductivities of the in situ polymerized CSE with different HNT contents as a function of temperature at a lithium salt concentration of 30wt%.

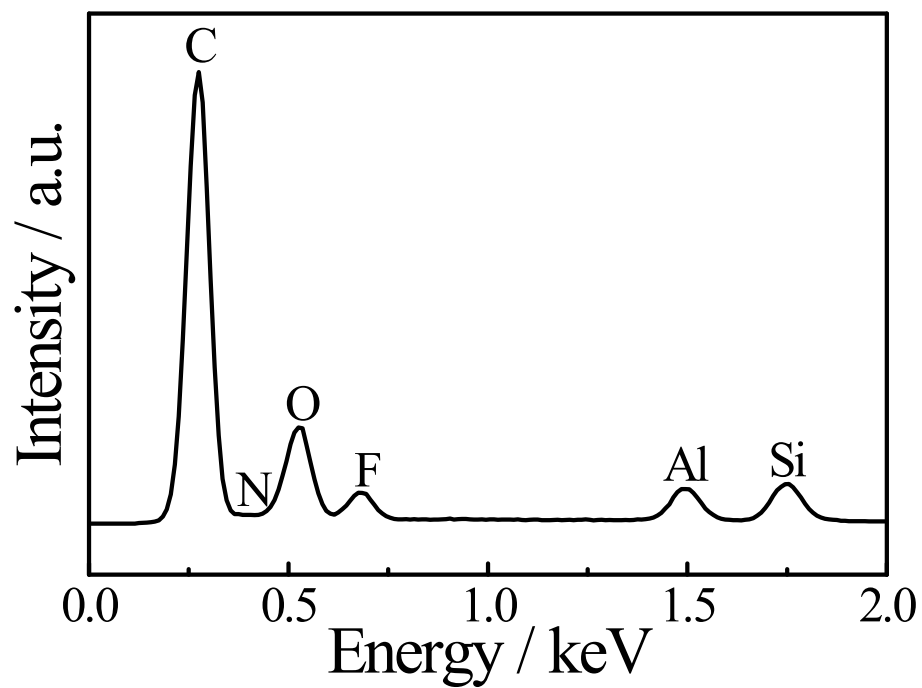

**Fig. S7.** EDS results obtained from TEM-EDS.

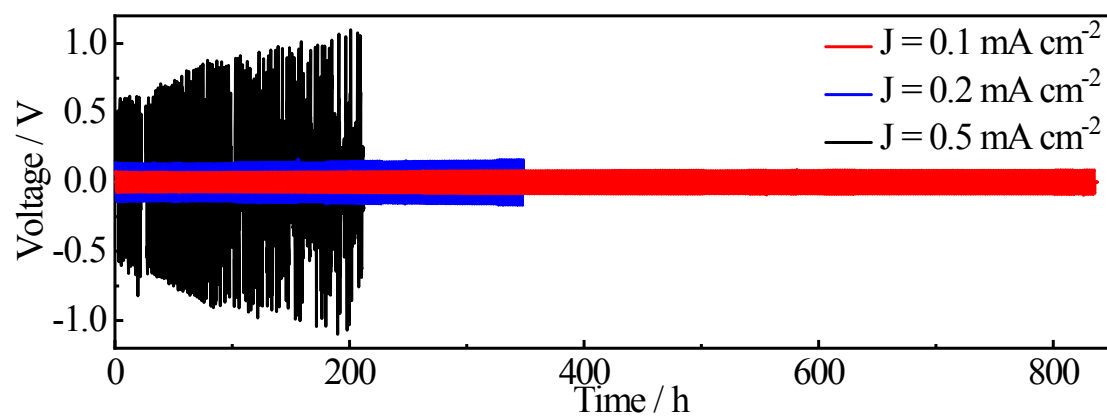

**Fig. S8.** Galvanostatic cycling curves of Li//Li symmetric cells with comb-like PCL based PSE.

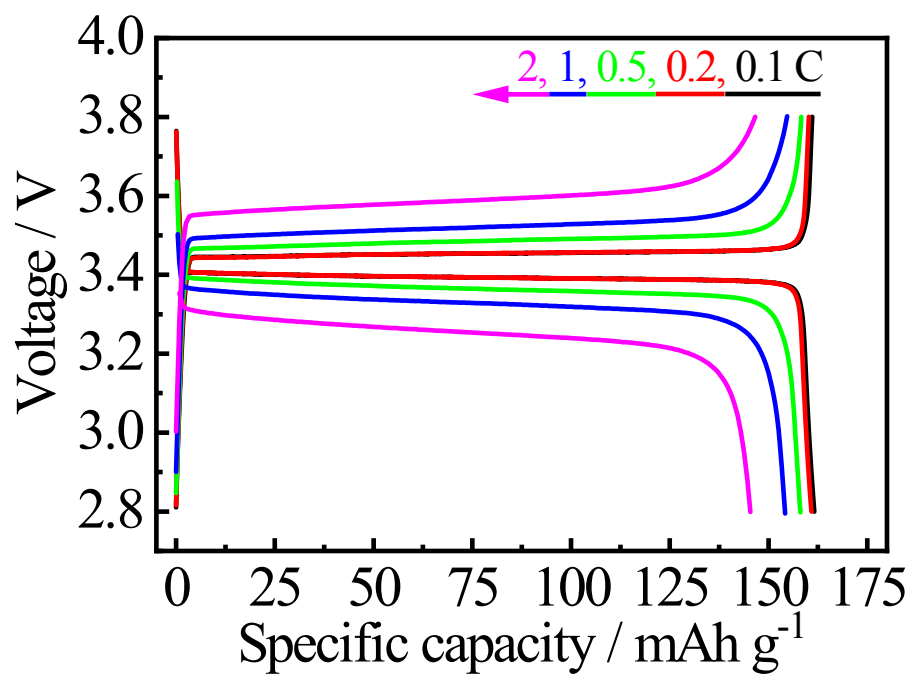

**Fig. S9.** Charge/discharge profiles of LFP/CSE/Li solid-state battery at various C-rate from 0.1C to 2C.

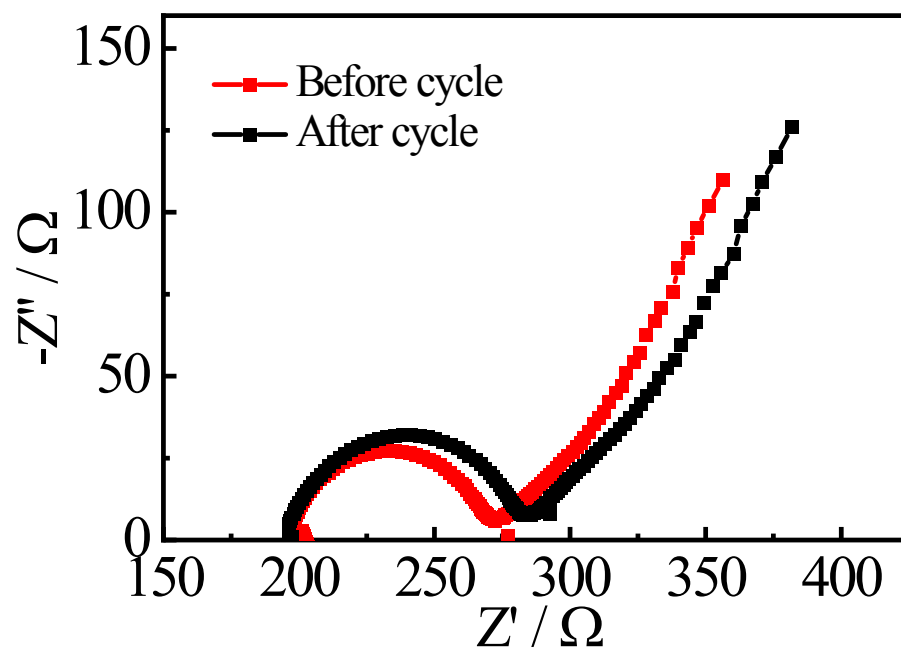

**Fig. S10.** EIS spectra of LFP/CSE/Li solid-state battery before and after 300 cycle at 1C.

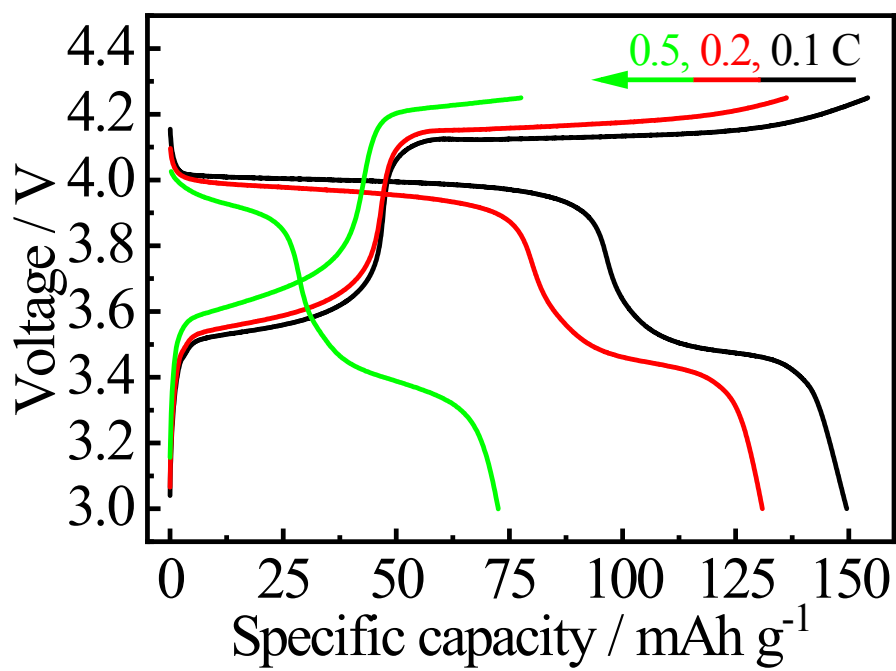

**Fig. S11.** Charge/discharge profiles of LFMP/CSE/Li solid-state battery at various C-rate from 0.1C to 0.5C.
